# Supplementary material for: Pendant group effects on the optical and electrical properties of carbazole-diketopyrrolopyrrole copolymers
Source: Royal Society of Chemistry journal article supplement (doi:10.1039/c3ta11058c), 2013-01-01
Supplement: c3ta11058c.pdf [file c3ta11058c.pdf]

Supporting Information

## Pendant Group Effects on the Optical and Electrical Properties of Carbazole-Diketopyrrolopyrrole Copolymers

Obum Kwon,<sup>a</sup> Jang Jo,<sup>b</sup> Bright Walker,<sup>c</sup> Guillermo C. Bazan,<sup>a</sup> and Jung Hwa Seo<sup>\*d</sup>

<sup>a</sup>Department of Chemistry & Biochemistry, University of California, Santa Barbara, California 93106

<sup>b</sup>Department of Physics, University of California, Santa Barbara, California 93106

<sup>c</sup>Department of Interdisciplinary Green Energy, Ulsan National Institute of Science and Technology, Ulsan 689-798, South Korea

<sup>d</sup>Department of Materials Physics, Dong-A University, Busan 614-070, South Korea

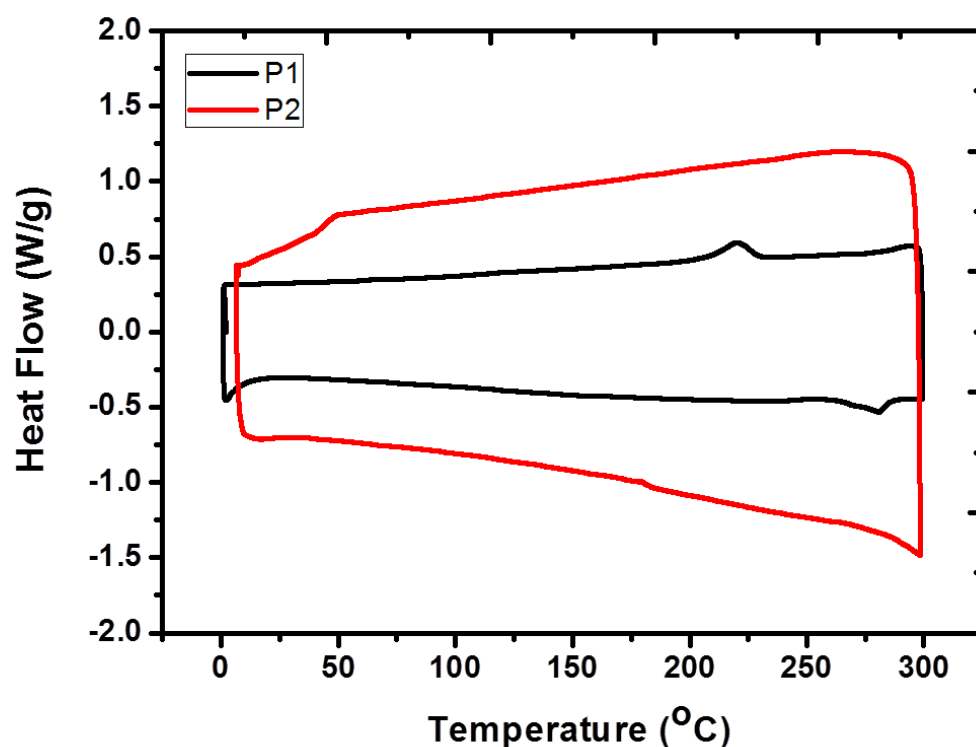

**Figure S1.** Differential Scanning Calorimetry (DSC) traces of **P1** and **P2**.

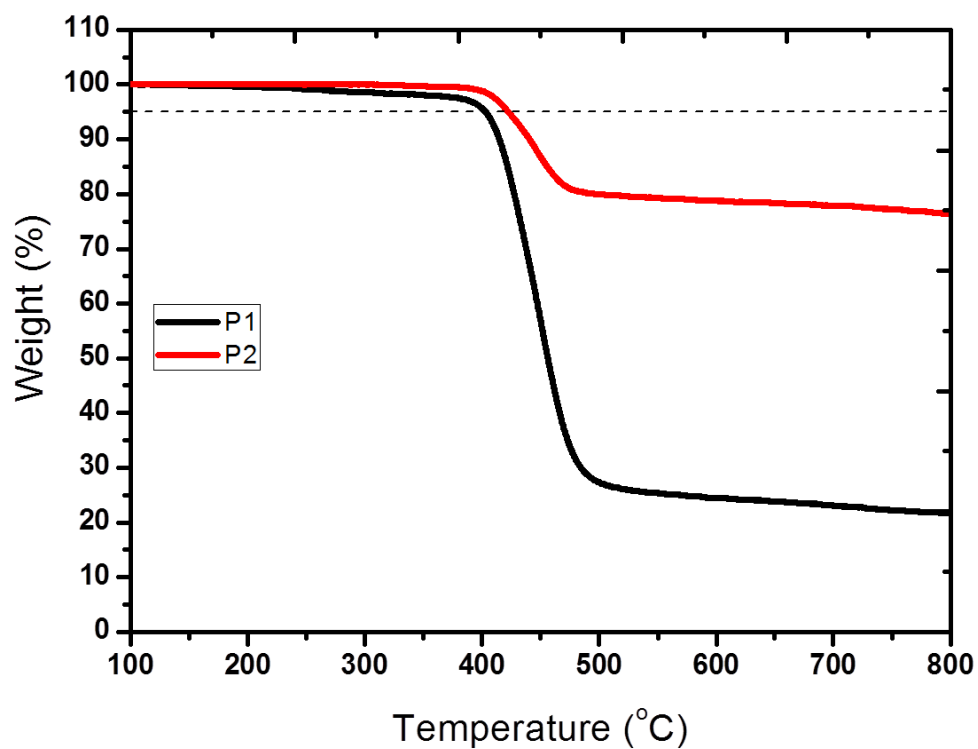

**Figure S2.** Thermogravimetric Analysis (TGA) of **P1** and **P2**.

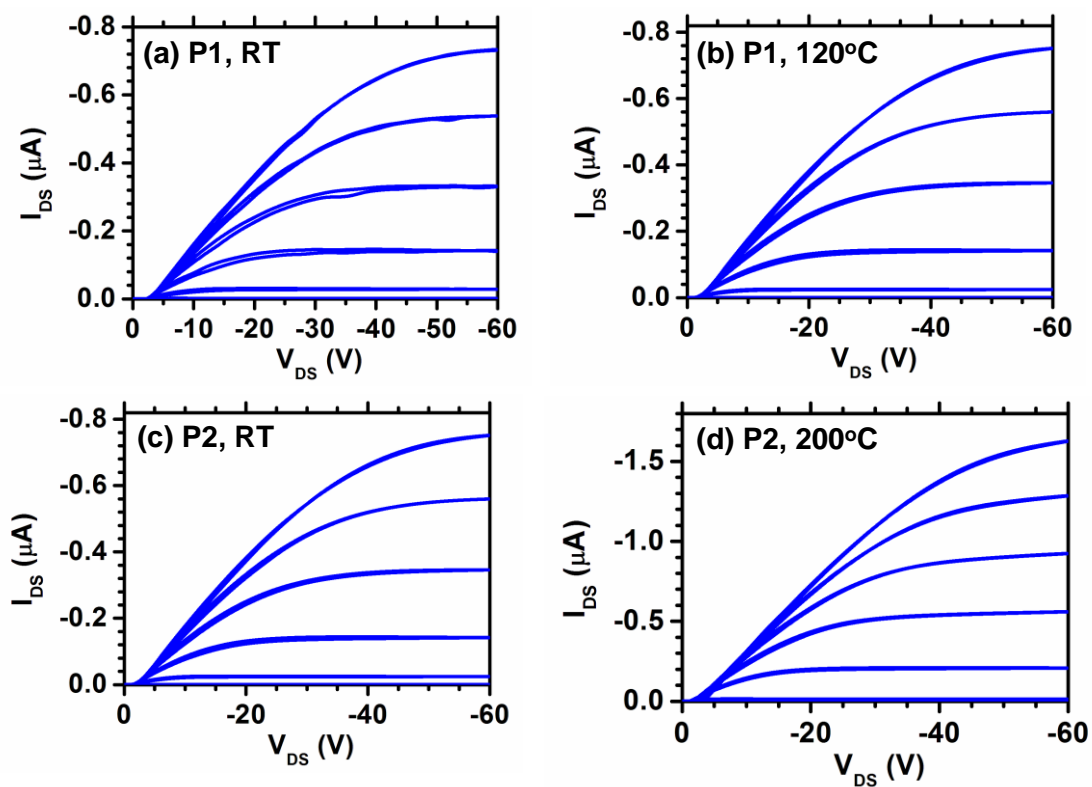

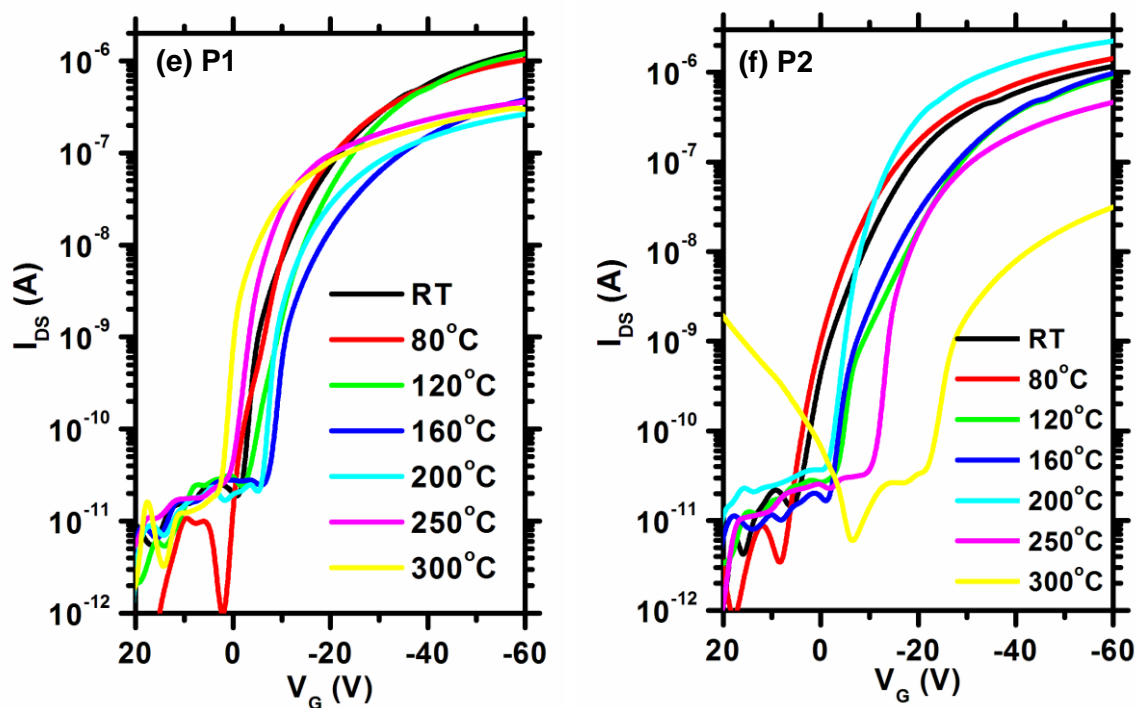

**Figure S3.** Output curves of **P1** FETs (a) at room temperature and (b) annealed at 120°C and **P2** FETs (c) at room temperature and (d) annealed at 200°C. Transfer curves of (e) **P1** and (f) **P2** FETs as a function of annealing temperature.

**Table 1.** Summary of device performance of **P1** and **P2** FETs with various annealing temperatures.

| Annealing<br>Temp. (°C) | <b>P1</b>                    |              |                   | <b>P2</b>                    |              |                   |
|-------------------------|------------------------------|--------------|-------------------|------------------------------|--------------|-------------------|
|                         | $\mu$ (cm <sup>2</sup> /V·s) | $V_{th}$ (V) | $I_{on}/I_{off}$  | $\mu$ (cm <sup>2</sup> /V·s) | $V_{th}$ (V) | $I_{on}/I_{off}$  |
| RT                      | $1.3 \times 10^{-3}$         | -6.7         | $1.6 \times 10^7$ | $1.6 \times 10^{-3}$         | -6           | $2.6 \times 10^6$ |
| 80                      | $1.2 \times 10^{-3}$         | -8.5         | $1.0 \times 10^7$ | $1.6 \times 10^{-3}$         | -3           | $2.9 \times 10^6$ |
| 120                     | $1.7 \times 10^{-3}$         | -11          | $6.8 \times 10^5$ | $1.6 \times 10^{-3}$         | -16          | $3.5 \times 10^5$ |
| 160                     | $4.3 \times 10^{-4}$         | -9           | $3.9 \times 10^5$ | $1.4 \times 10^{-3}$         | -14          | $6.0 \times 10^5$ |
| 200                     | $3.9 \times 10^{-4}$         | -6           | $5.7 \times 10^6$ | $4.4 \times 10^{-3}$         | -6           | $7.5 \times 10^5$ |
| 250                     | $8.6 \times 10^{-4}$         | -1           | $1.7 \times 10^5$ | $7.4 \times 10^{-4}$         | -12          | $1.6 \times 10^6$ |
| 300                     | $5.0 \times 10^{-4}$         | -1           | $1.2 \times 10^6$ | $5.3 \times 10^{-5}$         | -20          | $1.1 \times 10^5$ |

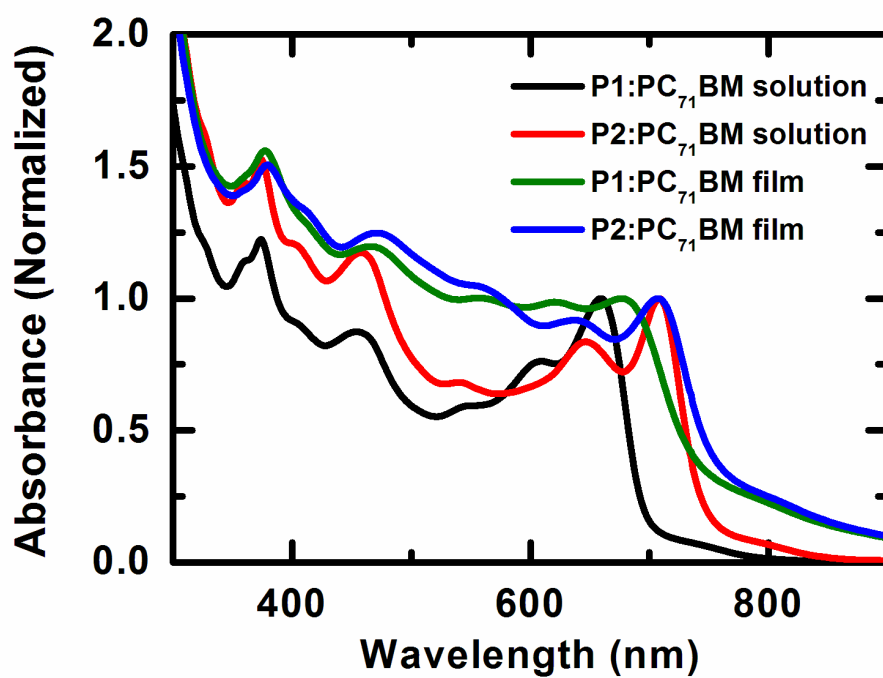

**Figure S4.** UV-Vis absorption spectra of **P1:PC<sub>71</sub>BM** and **P2:PC<sub>71</sub>BM** in solution and film.
